# Supplementary material for: Pembrolizumab plus azacitidine in patients with chemotherapy refractory metastatic colorectal cancer: a single-arm phase 2 trial and correlative biomarker analysis
Source: PubMed Central journal article supplement (PMC8740438; doi:10.1186/s13148-021-01226-y), 2022-01-06

Figure S1.

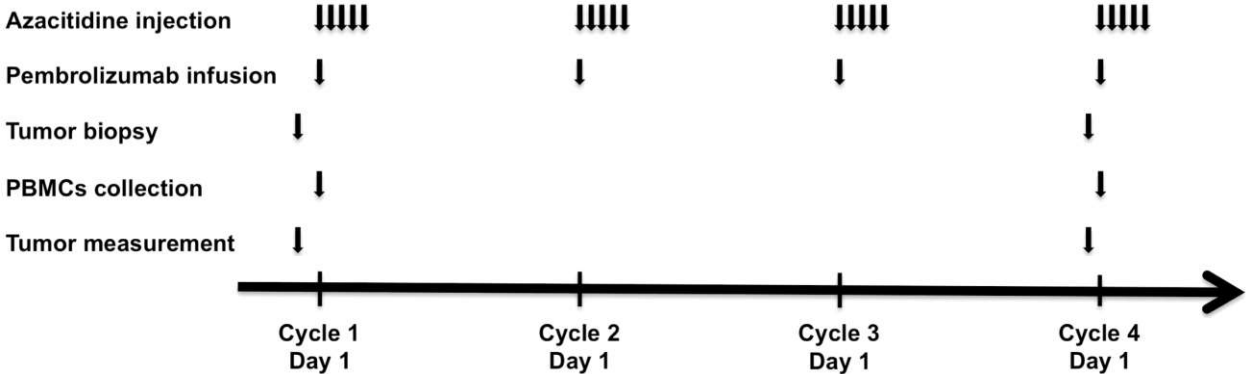

**Figure S2.**

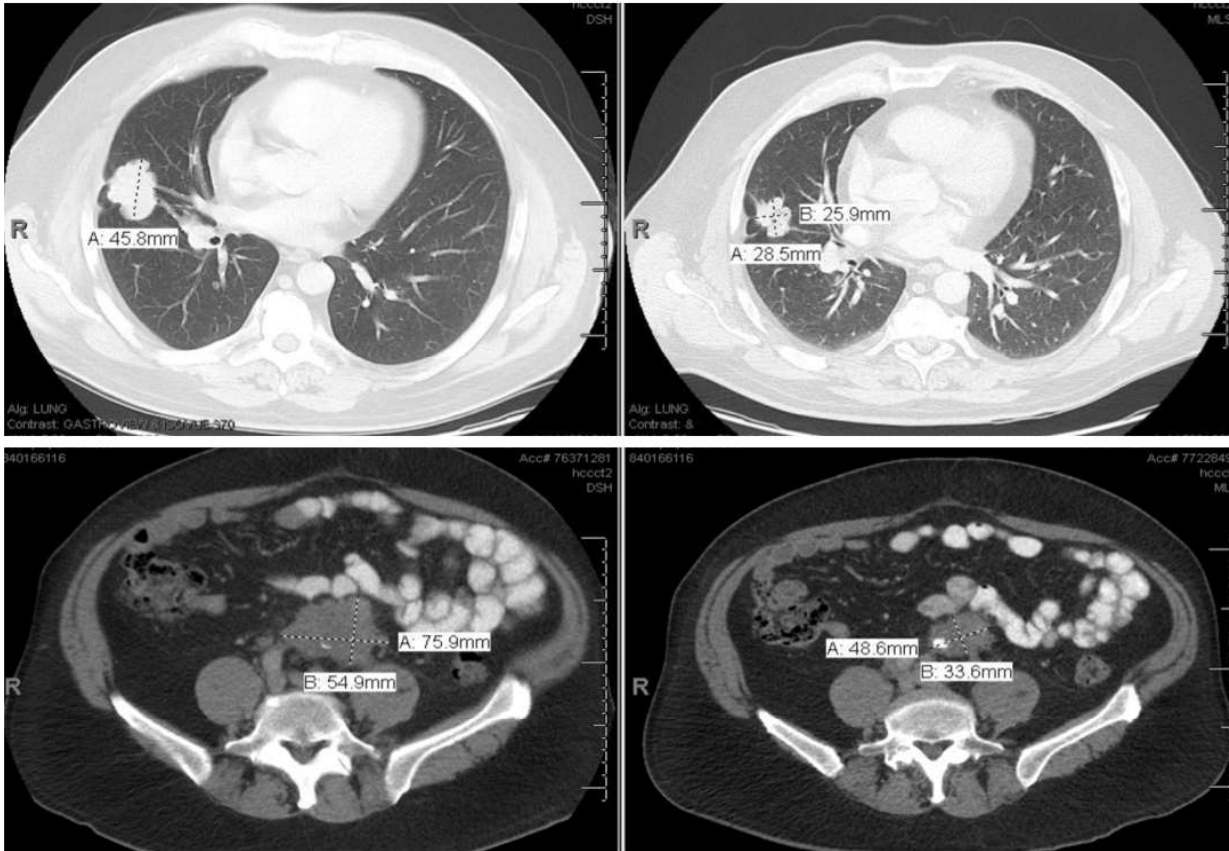

At the baseline  
(before cycle 1 day 1)

At the end of cycle 4 (12 weeks  
from cycle 1 day 1)  
→ 32% reduction of target lesions

Figure S3.

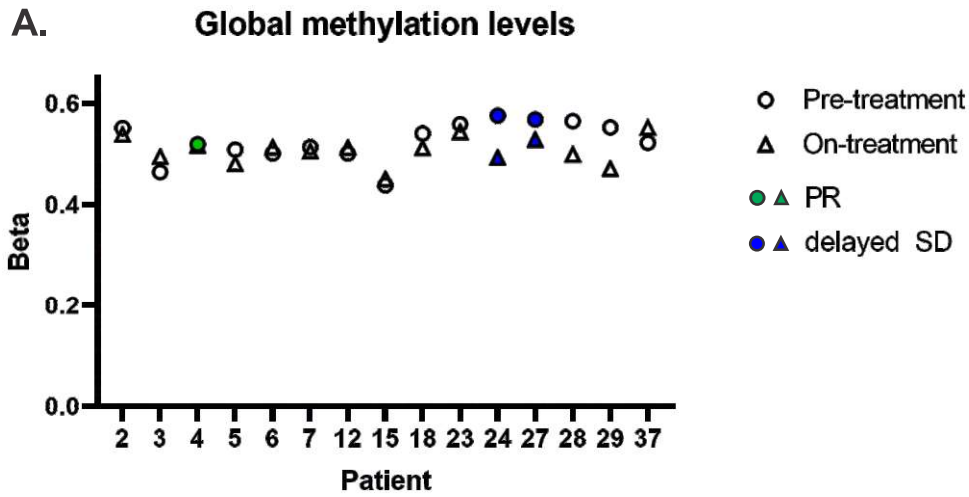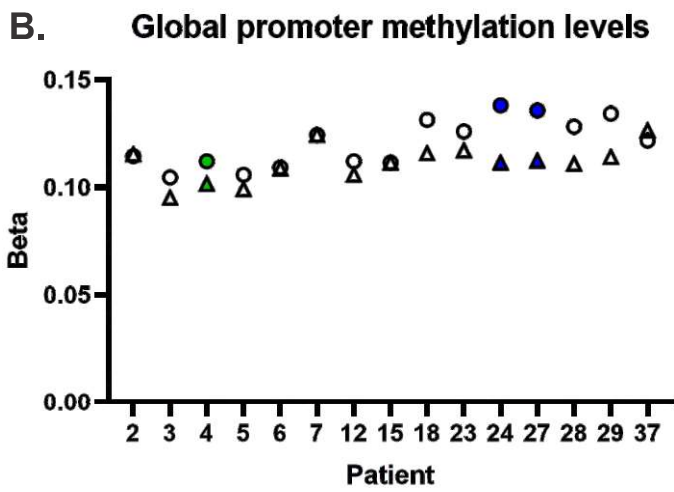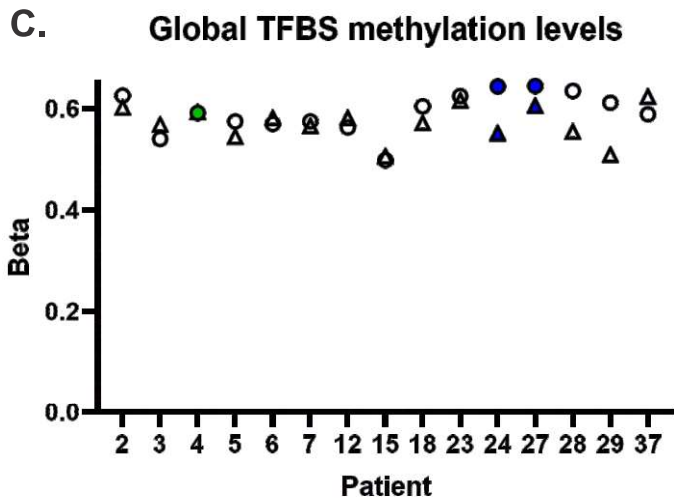

Figure S4.

A.

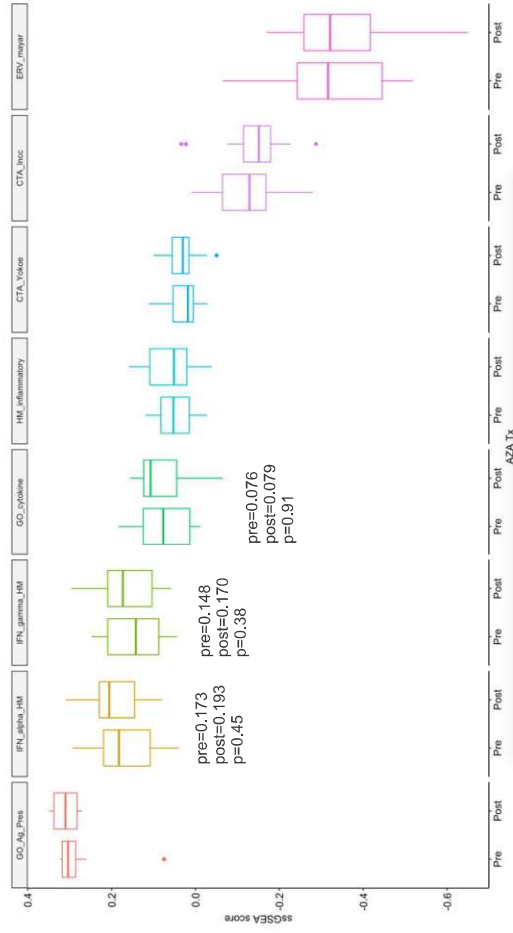

B.

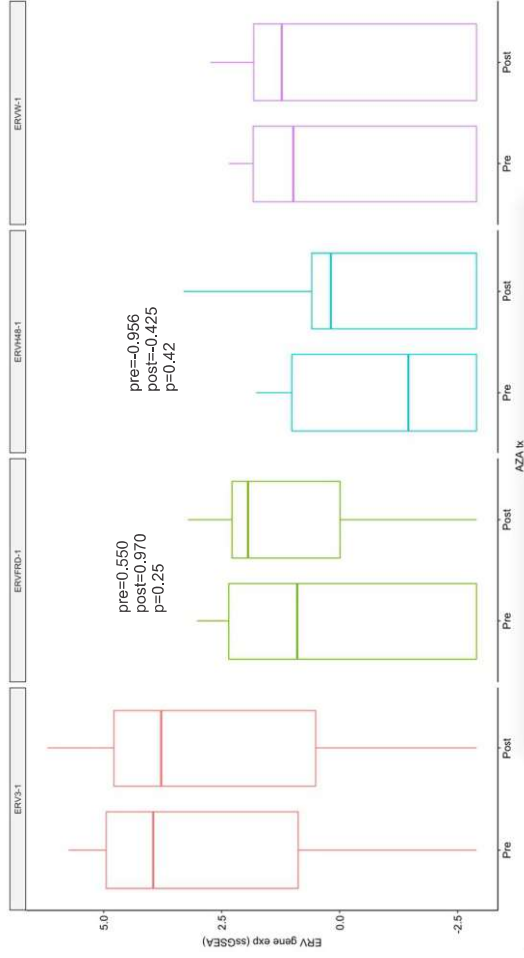

C.

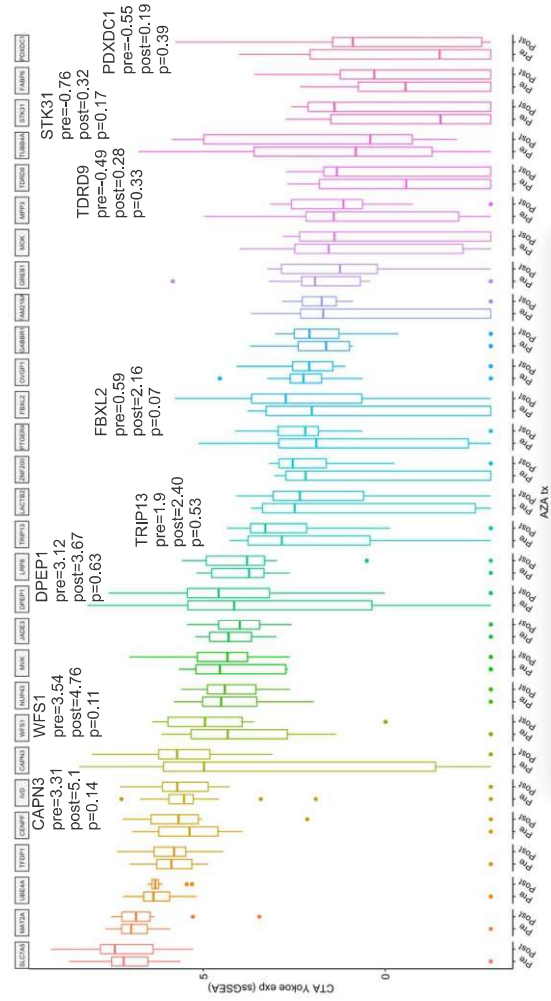

D.

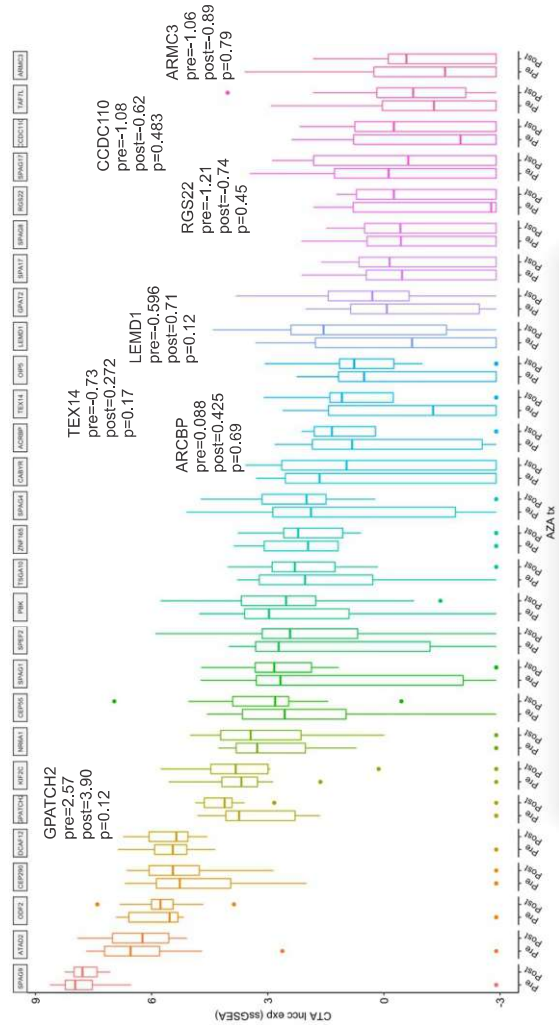

Figure S5.

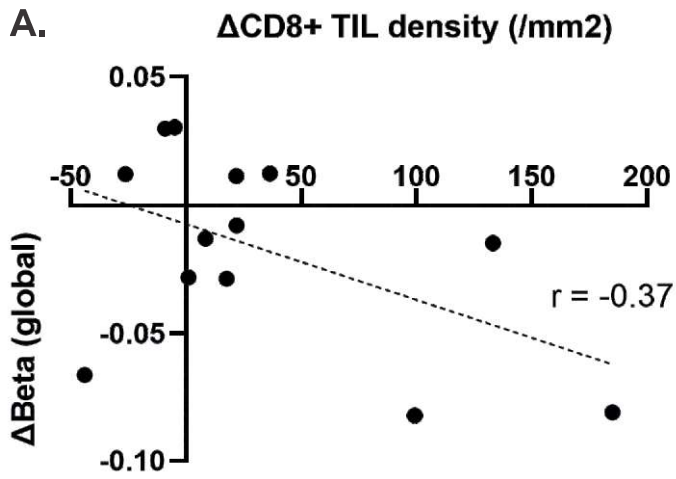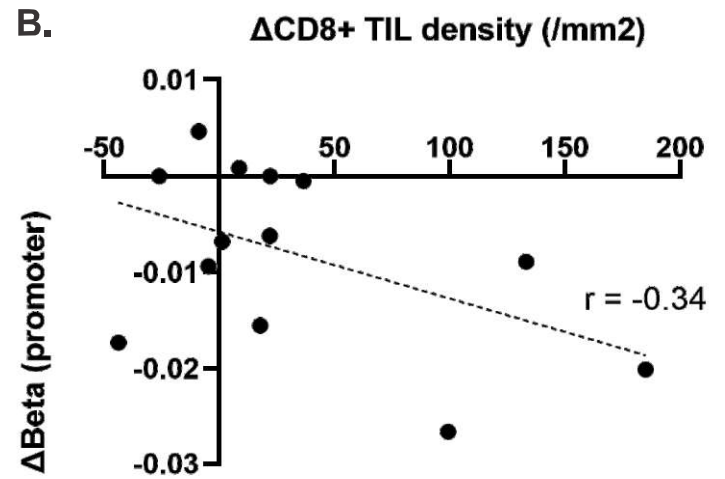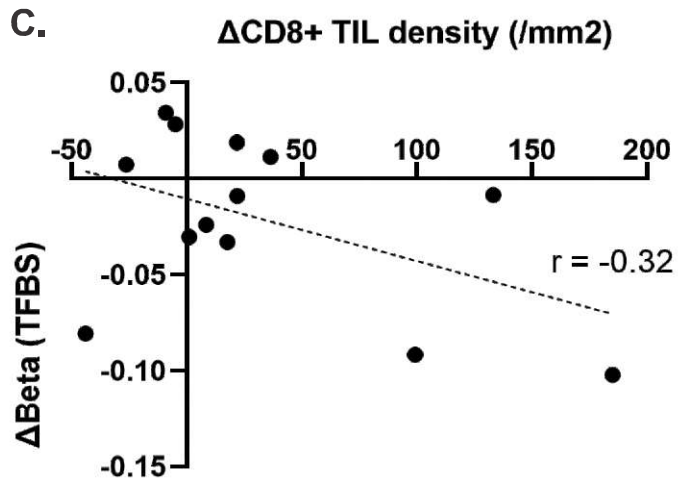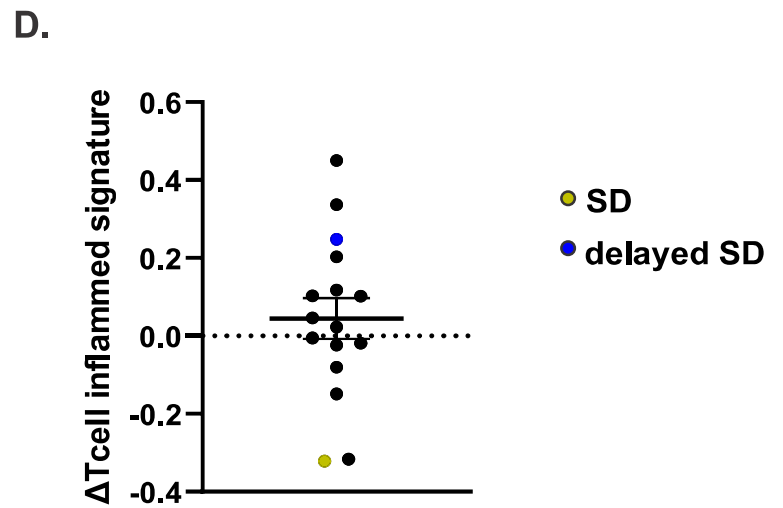

Supplement: 13148_2021_1226_MOESM2_ESM.pdf [file 13148_2021_1226_MOESM2_ESM.pdf]
